# Supplementary material for: Clinical spectrum and genetic variations of LMNA-related muscular dystrophies in a large cohort of Chinese patients
Source: PubMed Central journal article supplement — J Med Genet. 2020 Jun 22;58(5):326–33. doi: 10.1136/jmedgenet-2019-106671 (PMC8086255; doi:10.1136/jmedgenet-2019-106671), 2020-06-22
Supplement: jmedgenet-2019-106671supp001.pdf [file jmedgenet-2019-106671supp001.pdf]

**Table S1** Clinical features of 84 *LMNA*-related muscular dystrophy

| Patient     | Phenotype | Sex | Age of onset | Age at last review/Maximum motor milestone | Contractures            | Spinal deformities    | Highest CK level (U/L) | ECG                                 | UCG                                                                                             | EMG        | Muscle biopsy                          |
|-------------|-----------|-----|--------------|--------------------------------------------|-------------------------|-----------------------|------------------------|-------------------------------------|-------------------------------------------------------------------------------------------------|------------|----------------------------------------|
| P1          | EDMD      | F   | 1y           | Deceased 20y/walking                       | Elbow, knee             | Scoliosis             | 451                    | Atrial rest, atrioventricular block | Enlargement of the right heart and decreased systolic and diastolic function of the whole heart | Myogenic   | Dystrophic (9y)                        |
| P2          | L-CMD     | F   | Birth        | 16y/walking                                | Elbow, knee, ankle      | Lordosis, rigid spine | 623                    | Sinus arrhythmia                    | n/a                                                                                             | n/a        | n/a                                    |
| P3          | L-CMD     | M   | Birth        | Deceased 7y/sitting                        | Elbow, knee, ankle, hip |                       | 1248                   | n/a                                 | n/a                                                                                             | Neurogenic | n/a                                    |
| P4          | L-CMD     | F   | Birth        | 10y7m/sitting                              | Ankle, knee, hip        | Lordosis              | 882                    | Normal                              | Normal                                                                                          | Myogenic   | Dystrophic, Inflammatory change (1.5y) |
| P5          | EDMD      | F   | 1y3m         | 10y9m/running                              | Elbow                   | Rigid spine           | 427                    | Normal                              | Normal                                                                                          | Myogenic   | Dystrophic (3y)                        |
| P5's Father | EDMD      | M   | 43y          | 43y/running                                | Elbow, ankle            | Rigid spine,          | 293                    | sinus bradycardi                    | n/a                                                                                             | n/a        | n/a                                    |

|     |       |   |       |                |                     |                                        |       |                                                            |                                     |          |                                                 |
|-----|-------|---|-------|----------------|---------------------|----------------------------------------|-------|------------------------------------------------------------|-------------------------------------|----------|-------------------------------------------------|
| P6  | EDMD  | F | 2y    | 16y/walking    | Elbow,<br>ankle     | scoliosis<br>Scoliosis,<br>rigid spine | 244.9 | Normal                                                     | Normal                              | Normal   | n/a                                             |
| P7  | L-CMD | M | Birth | 9y1m/sitting   | Ankle, hip          |                                        | 511   | Normal                                                     | Normal                              | Myogenic | Dystrophic<br>(1y7m)                            |
| P8  | L-CMD | M | Birth | 8y4m/walking   |                     | Scoliosis                              | 1653  | Normal                                                     | Normal                              | Myogenic | Dystrophic,<br>Inflammator<br>y change<br>(10m) |
| P9  | L-CMD | M | 13m   | 12y2m/walking  | Ankle, knee,<br>hip |                                        | 749   | Sinus<br>arrhythmia                                        | Normal                              | Normal   | Dystrophic<br>(5y)                              |
| P10 | L-CMD | F | Birth | 7y5m/sitting   |                     |                                        | 3766  | Sinus<br>arrhythmia                                        | left<br>ventricular<br>false tendon | Normal   | Dystrophic,<br>Inflammator<br>y change<br>(7m)  |
| P11 | L-CMD | F | Birth | 11y11m/walking | Ankle, knee,<br>hip | Lordosis                               | 371   | Normal                                                     | Normal                              | Normal   | Dystrophic<br>(4y)                              |
| P12 | EDMD  | F | 4y    | 11y11m/running | Elbow               | Rigid spine                            | 554   | Sinus<br>rhythm,<br>frequent<br>atrial<br>extrasystol<br>e | Normal                              | Myogenic | Myopathic<br>(5y)                               |
| P13 | L-CMD | M | 1y3m  | 9y8m/walking   | Ankle               | Lordosis                               | 1046  | Normal                                                     | Normal                              | Myogenic | Dystrophic<br>(2y11m)                           |

|     |       |   |       |                |                  |          |        |                   |        |            |                                        |
|-----|-------|---|-------|----------------|------------------|----------|--------|-------------------|--------|------------|----------------------------------------|
| P14 | L-CMD | F | Birth | 8y4m/sitting   | Knee, hip, ankle | Lordosis | 1062   | Sinus tachycardia | Normal | Normal     | Dystrophic (1y)                        |
| P15 | L-CMD | F | Birth | 7y6m/sitting   | Ankle            |          | 1817   | Sinus tachycardia | Normal | n/a        | Dystrophic, Inflammatory change (1y2m) |
| P16 | EDMD  | M | 1y2m  | 11y10m/walking | Elbow, ankle     |          | 568    | Normal            | Normal | Normal     | Dystrophic, Inflammatory change (6y)   |
| P17 | EDMD  | F | 1y    | 13y4m/walking  | Elbow, ankle     | Lordosis | 992    | Normal            | Normal | Myogenic   | n/a                                    |
| P18 | L-CMD | F | Birth | 7y9m/sitting   | Ankle            |          | 195    | n/a               | n/a    | Myogenic   | Dystrophic (1y8m)                      |
| P19 | L-CMD | M | Birth | 6y9m/walking   | Ankle            | Lordosis | 484    | Normal            | Normal | n/a        | Dystrophic (1y3m)                      |
| P20 | L-CMD | M | Birth | 6y3m/sitting   | Ankle            | Lordosis | 1568.6 | n/a               | n/a    | n/a        | n/a                                    |
| P21 | EDMD  | M | 1y6m  | 11y/running    |                  |          | 1089   | Sinus tachycardia | Normal | Myogenic   | n/a                                    |
| P22 | L-CMD | F | 6m    | 7y4m/sitting   | Ankle            | Lordosis | 770    | Normal            | Normal | n/a        | n/a                                    |
| P23 | L-CMD | M | Birth | 5y11m/sitting  |                  | Lordosis | 871    | Normal            | Normal | Neurogenic | Myopathic, Inflammatory change (1y4m)  |

|     |       |   |       |               |                   |             |      |                   |        |          |                 |
|-----|-------|---|-------|---------------|-------------------|-------------|------|-------------------|--------|----------|-----------------|
| P24 | EDMD  | M | 2y    | 18y/running   | Elbow, ankle      | Rigid spine | 691  | Sinus arrhythmia  | n/a    | Myogenic | n/a             |
| P25 | EDMD  | F | 2y    | 8y7m/running  | Ankle             |             | 1005 | Sinus arrhythmia  | Normal | Myogenic | Dystrophic (4y) |
| P26 | EDMD  | F | 1y6m  | 9y8m/walking  | Elbow, ankle      | Lordosis    | 927  | Sinus arrhythmia  | Normal | Myogenic | n/a             |
| P27 | L-CMD | M | Birth | 5y3m/walking  |                   |             | 2648 | Sinus tachycardia | Normal | Normal   | n/a             |
| P28 | L-CMD | M | Birth | 10y7m/walking |                   |             | 493  | Normal            | Normal | Myogenic | n/a             |
| P29 | L-CMD | M | Birth | 4y10m/sitting |                   | Lordosis    | 1738 | Normal            | Normal | n/a      | n/a             |
| P30 | L-CMD | M | Birth | 6y2m/walking  | Ankle             | Lordosis    | 1428 | Normal            | Normal | Myogenic | n/a             |
| P31 | L-CMD | M | Birth | 9y6m/walking  | Elbow, ankle, hip | Lordosis    | 727  | Sinus arrhythmia  | Normal | Normal   | n/a             |
| P32 | EDMD  | F | 2y    | 5y8m/walking  | Ankle             |             | 950  | Normal            | Normal | Myogenic | n/a             |
| P33 | EDMD  | M | 1y2m  | 8y5m/running  | Ankle             | Lordosis    | 774  | Normal            | Normal | Myogenic | n/a             |
| P34 | EDMD  | M | 2y8m  | 7y3m/running  | Ankle             |             | 1200 | Normal            | Normal | n/a      | Dystrophic (2y) |
| P35 | L-CMD | F | Birth | 5y5m/walking  |                   | Lordosis    | 723  | Normal            | Normal | n/a      | n/a             |
| P36 | L-CMD | M | Birth | 3y4m/sitting  |                   | Lordosis    | 793  | Sinus tachycardia | Normal | n/a      | Myopathic (7m)  |

|     |       |   |       |              |              |          |        |                                  |                      |            |                                        |
|-----|-------|---|-------|--------------|--------------|----------|--------|----------------------------------|----------------------|------------|----------------------------------------|
| P37 | L-CMD | M | Birth | 7y4m/walking |              | Lordosis | 2241   | Sinus tachycardia                | Normal               | Myogenic   | Dystrophic, Inflammatory change (1y9m) |
| P38 | L-CMD | M | Birth | 3y6m/sitting | Ankle        |          | 1530.8 | Normal                           | Normal               | Myogenic   | n/a                                    |
| P39 | L-CMD | M | Birth | 3y7m/sitting |              |          | 929    | n/a                              | n/a                  | Neurogenic | n/a                                    |
| P40 | L-CMD | F | Birth | 6y3m/walking |              |          | 370    | Normal                           | Normal               | Myogenic   | n/a                                    |
| P41 | L-CMD | F | Birth | 2y5m/sitting |              |          | n/a    | Normal                           | Normal               | Myogenic   | n/a                                    |
| P42 | EDMD  | M | 1y    | 7y3m/running |              | Lordosis | 528    | Sinus arrhythmia                 | Normal               | Myogenic   | n/a                                    |
| P43 | EDMD  | M | 1y6m  | 7y5m/walking | Elbow, ankle |          | 462    | Normal                           | Normal               | Normal     | Dystrophic, Inflammatory change (3.5y) |
| P44 | EDMD  | M | 2y    | 3y5m/running |              |          | 1356   | n/a                              | n/a                  | Normal     | n/a                                    |
| P45 | EDMD  | M | 1y3m  | 4y5m/running |              |          | 967    | Sinus tachycardia                | Normal               | Myogenic   | n/a                                    |
| P46 | L-CMD | F | Birth | 2y9m/walking |              | Lordosis | 1674   | Normal                           | Normal               | Myogenic   | n/a                                    |
| P47 | EDMD  | M | 1y3m  | 3y1m/walking |              | Lordosis | 2595   | Sinus arrhythmia, premature beat | Patent foramen ovale | Myogenic   | Dystrophic (2.5y)                      |

|                 |        |   |      |                    |              |             |      |                           |                                     |          |                      |
|-----------------|--------|---|------|--------------------|--------------|-------------|------|---------------------------|-------------------------------------|----------|----------------------|
| P48             | LGMD1B | M | 1y3m | 6y8m/running       |              |             | 278  | Normal                    | Normal                              | n/a      | n/a                  |
| P48's<br>Mother | LGMD1B | F | 1y3m | 35y/running        |              |             | 162  | Normal                    | Normal                              | n/a      | n/a                  |
| P49             | EDMD   | M | 1y6m | 2y10m/running      | Ankle        |             | 3278 | Normal                    | Normal                              | n/a      | n/a                  |
| P50             | EDMD   | M | 2y   | 4y4m/walking       |              |             | 1027 | Sinus<br>tachycardia      | left<br>ventricular<br>false tendon | Myogenic | n/a                  |
| P51             | L-CMD  | F | 4m   | 3y4m/sitting aided | Ankle        | Lordosis    | 1455 | Normal                    | Normal                              | Normal   | n/a                  |
| P52             | EDMD   | F | 10y  | 24y/walking        | Ankle        |             | 223  | Normal                    | Normal                              | Myogenic | Dystrophic<br>(24y)  |
| P53             | EDMD   | M | 1y   | 19y/walking        | Elbow, ankle |             | 929  | Normal                    | Normal                              | Myogenic | Dystrophic<br>(19y)  |
| P54             | EDMD   | F | 3y   | 29y/walking        | Elbow, ankle | Rigid spine | n/a  | Atrioventricular<br>block | Normal                              | Myogenic | Dystrophic<br>(29y)  |
| P55             | EDMD   | M | 2y   | 4y/walking         | Ankle        |             | 1361 | Normal                    | Normal                              | Myogenic | Dystrophic<br>(4y)   |
| P56             | EDMD   | F | 4y   | 14y/walking        | Ankle        | Scoliosis   | 820  | Sinus<br>tachycardia      | Normal                              | Myogenic | Dystrophic<br>(14y)  |
| P57             | LGMD1B | F | 1y3m | 3y/walking         |              |             | 2623 | Normal                    | Normal                              | Myogenic | Dystrophic<br>(3y)   |
| P58             | LGMD1B | M | 1y   | 2y6m/walking       |              |             | 413  | Normal                    | Normal                              | Myogenic | Dystrophic<br>(2.5y) |
| P59             | LGMD1B | F | 11y  | 16y/running        |              |             | 710  | Sinus                     | Normal                              | Myogenic | Dystrophic           |

|                 |        |   |      |                    |              |          |      |            |        |                                                 |
|-----------------|--------|---|------|--------------------|--------------|----------|------|------------|--------|-------------------------------------------------|
|                 |        |   |      |                    |              |          |      | tachycardi |        | (16y)                                           |
|                 |        |   |      |                    |              |          |      | a          |        |                                                 |
| P60             | LGMD1B | F | 1y   | 3y/walking         |              |          | 350  | Normal     | Normal | Myogenic Dystrophic (3y)                        |
| P61             | L-CMD  | M | 11m  | 2y6m/sitting       | Ankle        |          | 1046 | Normal     | Normal | Myogenic Dystrophic (2.5y)                      |
| P62             | L-CMD  | M | 2m   | 1y6m/sitting aided | Ankle, wrist |          | 445  | Normal     | Normal | Myogenic Dystrophic, Inflammatory change (1.5y) |
| P63             | L-CMD  | F | 1y   | 4y6m/sitting aided |              |          | 736  | Normal     | Normal | Myogenic Dystrophic (4.5y)                      |
| P64             | L-CMD  | F | 8m   | 8y/sitting aided   | Knee, ankle  |          | 372  | Normal     | Normal | Myogenic Dystrophic, Inflammatory change (8y)   |
| P65             | L-CMD  | F | 6m   | 3y/sitting aided   |              |          | 898  | Normal     | Normal | Myogenic Dystrophic, Inflammatory change (3y)   |
| P66             | LGMD1B | M | 1y2m | 3y/walking         |              |          | 904  | Normal     | Normal | Myogenic Dystrophic (3y)                        |
| P66's<br>Father | LGMD1B | M | 5y   | 38y/walking        | Ankle        |          | 800  | Normal     | Normal | Myogenic Dystrophic (38y)                       |
| P67             | L-CMD  | M | 1y   | 2y3m/walking       | Ankle        | Lordosis | 435  | Normal     | Normal | n/a                                             |

|     |        |   |      |                     |                  |             |      |                             |        |          |                      |
|-----|--------|---|------|---------------------|------------------|-------------|------|-----------------------------|--------|----------|----------------------|
| P68 | L-CMD  | F | 1y   | 1y6m/walking        |                  | Lordosis    | 1506 | Normal                      | Normal | n/a      | n/a                  |
| P69 | L-CMD  | F | 1y   | 3y3m/walking        |                  | Lordosis    | 2208 | Normal                      | Normal | Myogenic | n/a                  |
| P70 | L-CMD  | M | 2y   | 3y/walking          |                  | Lordosis    | 733  | Normal                      | Normal | Myogenic | n/a                  |
| P71 | LGMD1B | F | 2y   | 4y5m/walking        |                  |             | 2116 | Normal                      | Normal | n/a      | n/a                  |
| P72 | EDMD   | F | 2y   | 12y/walking         | Elbow, ankle     | Scoliosis   | 500  | Normal                      | Normal | Myogenic | n/a                  |
| P73 | LGMD1B | F | 2y   | 4y1m/walking        |                  |             | 1789 | Normal                      | Normal | n/a      | n/a                  |
| P74 | LGMD1B | F | 2y   | 3y11m/walking       | Ankle            |             | 799  | Normal                      | Normal | n/a      | n/a                  |
| P75 | EDMD   | F | 3y   | 14y3m/walking       | Elbow, ankle     | Rigid spine | 615  | Atrioventri-<br>cular block | Normal | n/a      | n/a                  |
| P76 | EDMD   | F | 3y   | 6y3m/walking        | Ankle            |             | 1705 | Normal                      | Normal | Myogenic | n/a                  |
| P77 | EDMD   | F | 1y6m | 6y5m/walking        | Ankle            |             | 349  | Normal                      | Normal | Myogenic | Dystrophic<br>(6.4y) |
| P78 | L-CMD  | F | 3m   | 6y11m/sitting aided | Wrist, hip, knee | Rigid spine | 1156 | Normal                      | Normal | n/a      | Dystrophic<br>(6.9y) |
| P79 | EDMD   | M | 2y   | 8y2m/walking        | Elbow, ankle     |             | 1259 | Normal                      | Normal | Normal   | Myopathic<br>(8.2)   |
| P80 | EDMD   | F | 3y   | 10y3m/walking       | Elbow, ankle     |             | 1186 | Normal                      | Normal | Myogenic | Myopathic<br>(10.3)  |
| P81 | L-CMD  | F | 3m   | 3y6m/sitting aided  |                  |             | 1779 | Normal                      | Normal | Normal   | n/a                  |

Abbreviations: L-CMD, *LMNA*-related congenital muscular dystrophy; EDMD, Emery-Dreifuss muscular dystrophy; LGMD1B, Limb-girdle muscular dystrophy type 1B; F, female; M, male; y, year; m, month; CK, creatine kinase; ECG, electrocardiogram; UCG, ultrasound cardiography; EMG, electromyography; n/a, not available. The upper limit of the normal CK level in our research team is 195 U/L.

**Table S2** Univariate and multivariate Cox regression analysis of ambulance loss and cardiac involvement

|                     | Variables                | Univariate analysis |              |                | Multivariate analysis |              |                |
|---------------------|--------------------------|---------------------|--------------|----------------|-----------------------|--------------|----------------|
|                     |                          | HR                  | 95% CI       | <i>p</i> value | HR                    | 95% CI       | <i>p</i> value |
| Ambulance loss      | Gender                   | 0.308               | 0.079-1.198  | 0.089          | 0.381                 | 0.065-2.225  | 0.284          |
|                     | Age onset                | 2.244               | 0.355-14.162 | 0.039          | 2.571                 | 0.346-19.096 | 0.356          |
|                     | Mutation*                | 0.691               | 0.161-2.962  | 0.619          | 0.287                 | 0.054-1.519  | 0.142          |
|                     | Orthopedic complications | 0.610               | 0.119-3.121  | 0.553          | 0.444                 | 0.066-2.970  | 0.402          |
| Cardiac involvement | Gender                   | 1.398               | 0.519-3.769  | 0.508          | 2.315                 | 0.758-7.071  | 0.141          |
|                     | Age onset                | 0.634               | 0.191-2.103  | 0.457          | 0.432                 | 0.109-1.702  | 0.432          |
|                     | Mutation*                | 0.961               | 0.267-3.453  | 0.951          | 0.958                 | 0.289-3.173  | 0.944          |
|                     | Orthopedic complications | 0.244               | 0.068-0.879  | 0.031          | 0.188                 | 0.016-2.231  | 0.186          |

Abbreviations: CI, confidence interval; HR, hazard ratio. \*Mutations were divided into missense group and non-missense group. Bold values are statistically significant ( $p < 0.05$ ).

**Table S3** Genetic analysis of *LMNA*-related muscular dystrophy

| Patient     | Phenotype | <i>LMNA</i><br>exon/intron | Protein domain affected   | Nucleotide change   | Predicted amino acid<br>change | Inheritance    | Novel/reported |
|-------------|-----------|----------------------------|---------------------------|---------------------|--------------------------------|----------------|----------------|
| P1          | EDMD      | Exon1                      | Head                      | c.94_96delAAG       | p.K32del                       | <i>De novo</i> | Reported       |
| P2          | L-CMD     | Exon2                      | Coil 1B                   | c.422T>C            | p.L141P                        | <i>De novo</i> | Reported       |
| P3          | L-CMD     | Exon1                      | Head                      | c.91G>A             | p.E31K                         | <i>De novo</i> | Reported       |
| P4          | L-CMD     | Exon4                      | Coil 2A                   | c.745C>T            | p.R249W                        | <i>De novo</i> | Reported       |
| P5          | EDMD      | Exon9                      | Ig-like domain            | c.1580G>C           | p.R527P                        | Paternal       | Reported       |
| P5's Father | EDMD      | Exon9                      | Ig-like domain            | c.1580G>C           | p.R527P                        | Paternal       | Reported       |
| P6          | EDMD      | Exon1                      | Coil 1A                   | c.116A>G            | p.N39S                         | <i>De novo</i> | Reported       |
| P7          | L-CMD     | Exon6                      | Linker of coil 2B and NLS | c.1151A>G           | p.E384G                        | <i>De novo</i> | Reported       |
| P8          | L-CMD     | Intron8                    | Ig-like domain            | c.1489-14_1489-7del | p.I497_E536del                 | <i>De novo</i> | Reported       |
| P9          | L-CMD     | Exon1                      | Head                      | c.91_93delGAG       | p.E31del                       | <i>De novo</i> | Reported       |
| P10         | L-CMD     | Exon6                      | Coil 2B                   | c.1117A>G           | p.I373V                        | <i>De novo</i> | Reported       |
| P11         | L-CMD     | Exon1                      | Head                      | c.94_96delAAG       | p.K32del                       | <i>De novo</i> | Reported       |
| P12         | EDMD      | Exon4                      | Coil 2A                   | c.746G>A            | p.R249Q                        | <i>De novo</i> | Reported       |
| P13         | L-CMD     | Exon9                      | Ig-like domain            | c.1558T>C           | p.W520R                        | <i>De novo</i> | Reported       |
| P14         | L-CMD     | Exon1                      | Coil 1A                   | c.117T>G            | p.N39K                         | <i>De novo</i> | Reported       |
| P15         | L-CMD     | Exon1                      | Coil 1A                   | c.143G>C            | p.R48P                         | <i>De novo</i> | Reported       |
| P16         | EDMD      | Exon6                      | Coil 2B                   | c.1124C>G           | p.A375G                        | <i>De novo</i> | Novel          |
| P17         | EDMD      | Exon5                      | Coil 2B                   | c.832G>C            | p.A278P                        | <i>De novo</i> | Reported       |
| P18         | L-CMD     | Exon6                      | Coil 2B                   | c.1118T>A           | p.I373N                        | <i>De novo</i> | Reported       |
| P19         | L-CMD     | Exon6                      | Coil 2B                   | c.1147G>A           | p.E383K                        | <i>De novo</i> | Reported       |
| P20         | L-CMD     | Exon4                      | Coil 2A                   | c.745C>T            | p.R249W                        | <i>De novo</i> | Reported       |
| P21         | EDMD      | Exon9                      | Ig-like domain            | c.1540T>A           | p.W514R                        | <i>De novo</i> | Reported       |

|     |       |         |                           |                 |                  |                |          |
|-----|-------|---------|---------------------------|-----------------|------------------|----------------|----------|
| P22 | L-CMD | Exon4   | Coil 2A                   | c.745C>T        | p.R249W          | <i>De novo</i> | Reported |
| P23 | L-CMD | Exon4   | Coil 2A                   | c.745C>T        | p.R249W          | <i>De novo</i> | Reported |
| P24 | EDMD  | Exon4   | Linker of coil 2A and 2B  | c.778_780delAAG | p.K260del        | <i>De novo</i> | Reported |
| P25 | EDMD  | Exon7   | Ig-like domain            | c.1357C>T       | p.R453W          | <i>De novo</i> | Reported |
| P26 | EDMD  | Exon1   | Coil 1A                   | c.116A>G        | p.N39S           | <i>De novo</i> | Reported |
| P27 | L-CMD | Exon7   | Ig-like domain            | c.1372T>C       | p.S458P          | <i>De novo</i> | Novel    |
| P28 | L-CMD | Exon7   | Linker of coil 2B and NLS | c.1163G>C       | p.R388P          | <i>De novo</i> | Novel    |
| P29 | L-CMD | Exon1   | Head                      | c.95_97delAGG   | p.E33del         | <i>De novo</i> | Novel    |
| P30 | L-CMD | Exon6   | Coil 2B                   | c.1072G>A       | p.E358K          | <i>De novo</i> | Reported |
| P31 | L-CMD | Exon6   | Coil 2B                   | c.1072G>A       | p.E358K          | <i>De novo</i> | Reported |
| P32 | EDMD  | Exon6   | Coil 2B                   | c.1126T>C       | p.Y376H          | <i>De novo</i> | Novel    |
| P33 | EDMD  | Exon4   | Linker of coil 2A and 2B  | c.788T>C        | p.L263P          | <i>De novo</i> | Reported |
| P34 | EDMD  | Exon5   | Coil 2B                   | c.907T>C        | p.S303P          | <i>De novo</i> | Reported |
| P35 | L-CMD | Exon1   | Coil 1A                   | c.116A>G        | p.N39S           | <i>De novo</i> | Reported |
| P36 | L-CMD | Exon6   | Linker of coil 2B and NLS | c.1150G>A       | p.E384K          | <i>De novo</i> | Novel    |
| P37 | L-CMD | Exon7   | Ig-like domain            | c.1325T>G       | p.V442G          | <i>De novo</i> | Novel    |
| P38 | L-CMD | Exon4   | Coil 2A                   | c.745C>T        | p.R249W          | <i>De novo</i> | Reported |
| P39 | L-CMD | Exon4   | Coil 2A                   | c.745C>T        | p.R249W          | <i>De novo</i> | Reported |
| P40 | L-CMD | Exon4   | Coil 2A                   | c.745C>T        | p.R249W          | <i>De novo</i> | Reported |
| P41 | L-CMD | Exon1   | Head                      | c.92_94delAGA   | p.K32del         | <i>De novo</i> | Reported |
| P42 | EDMD  | Exon1   | Coil 1B                   | c.317T>C        | p.L106P          | <i>De novo</i> | Novel    |
| P43 | EDMD  | Exon4   | Coil 2A                   | c.746G>A        | p.R249Q          | <i>De novo</i> | Reported |
| P44 | EDMD  | Exon5   | Coil 2B                   | c.905T>C        | p.L302P          | <i>De novo</i> | Reported |
| P45 | EDMD  | Intron4 | Coil 2B                   | c.810+2delT     | p.(L271_Q312del) | <i>De novo</i> | Novel    |
| P46 | L-CMD | Exon1   | Coil 1A                   | c.122G>C        | p.R41P           | <i>De novo</i> | Novel    |

|        |        |       |                           |               |                 |                |          |
|--------|--------|-------|---------------------------|---------------|-----------------|----------------|----------|
| P47    | EDMD   | Exon1 | Head                      | c.94A>G       | p.K32E          | <i>De novo</i> | Reported |
| P48    | LGMD1B | Exon6 | Coil 2B                   | c.1004delG    | p.(R336Gfs*144) | Maternal       | Novel    |
| P48's  | LGMD1B | Exon6 | Coil 2B                   | c.1004delG    | p.(R336Gfs*144) | Maternal       | Novel    |
| Mother |        |       |                           |               |                 |                |          |
| P49    | EDMD   | Exon6 | Coil 2B                   | c.1110C>A     | p.D370E         | <i>De novo</i> | Novel    |
| P50    | EDMD   | Exon6 | Coil 2B                   | c.1072G>A     | p.E358K         | <i>De novo</i> | Reported |
| P51    | L-CMD  | Exon4 | Coil 2A                   | c.745C>T      | p.R249W         | <i>De novo</i> | Reported |
| P52    | EDMD   | Exon6 | Coil 2B                   | c.1090G>A     | p.D364N         | <i>De novo</i> | Novel    |
| P53    | EDMD   | Exon6 | Linker of coil 2B and NLS | c.1152G>C     | p.E384D         | <i>De novo</i> | Novel    |
| P54    | EDMD   | Exon8 | Ig-like domain            | c.1478A>C     | p.Q493P         | <i>De novo</i> | Novel    |
| P55    | EDMD   | Exon7 | Ig-like domain            | c.1357C>T     | p.R453W         | <i>De novo</i> | Reported |
| P56    | EDMD   | Exon7 | Ig-like domain            | c.1357C>T     | p.R453W         | <i>De novo</i> | Reported |
| P57    | LGMD1B | Exon4 | Linker of coil 1B and 2A  | c.695G>A      | p.G232E         | <i>De novo</i> | Reported |
| P58    | LGMD1B | Exon7 | Linker of coil 2B and NLS | c.1163G>C     | p.R388P         | <i>De novo</i> | Novel    |
| P59    | LGMD1B | Exon6 | Coil 2B                   | c.1106T>C     | p.L369P         | <i>De novo</i> | Novel    |
| P60    | LGMD1B | Exon7 | Linker of coil 2B and NLS | c.1159C>G     | p.L387V         | <i>De novo</i> | Reported |
| P61    | L-CMD  | Exon9 | Ig-like domain            | c.1558T>C     | p.W520R         | <i>De novo</i> | Novel    |
| P62    | L-CMD  | Exon4 | Coil 2A                   | c.745C>T      | p.R249W         | <i>De novo</i> | Reported |
| P63    | L-CMD  | Exon1 | Head                      | c.92_94delAGA | p.K32del        | <i>De novo</i> | Reported |
| P64    | L-CMD  | Exon4 | Coil 2A                   | c.745C>T      | p.R249W         | <i>De novo</i> | Reported |
| P65    | L-CMD  | Exon6 | Linker of coil 2B and NLS | c.1151A>G     | p.E384G         | <i>De novo</i> | Reported |
| P66    | LGMD1B | Exon9 | Ig-like domain            | c.1580G>C     | p.R527P         | <i>De novo</i> | Reported |
| P66's  | LGMD1B | Exon9 | Ig-like domain            | c.1580G>C     | p.R527P         | <i>De novo</i> | Reported |
| Father |        |       |                           |               |                 |                |          |
| P67    | L-CMD  | Exon4 | Coil 2A                   | c.746G>A      | p.R249Q         | <i>De novo</i> | Reported |

|     |        |       |                |                              |                |                |          |
|-----|--------|-------|----------------|------------------------------|----------------|----------------|----------|
| P68 | L-CMD  | Exon1 | Head           | c.96G>T                      | p.K32N         | <i>De novo</i> | Novel    |
| P69 | L-CMD  | Exon9 | Ig-like domain | c.1580G>C                    | p.R527P        | <i>De novo</i> | Reported |
| P70 | L-CMD  | Exon4 | Coil 2A        | c.745C>T                     | p.R249W        | <i>De novo</i> | Reported |
| P71 | LGMD1B | Exon7 | Coil 2B        | c.1336G>T                    | p.D446Y        | <i>De novo</i> | Novel    |
| P72 | EDMD   | Exon8 | Ig-like domain | c.1406T>C                    | p.I469T        | <i>De novo</i> | Novel    |
| P73 | LGMD1B | Exon7 | Ig-like domain | c.1357C>T                    | p.R453W        | <i>De novo</i> | Reported |
| P74 | LGMD1B | Exon1 | Head           | c.95A>C                      | p.K32T         | <i>De novo</i> | Novel    |
| P75 | EDMD   | Exon5 | Coil 2B        | c.890_901delTCCGCAT<br>CGACA | p.I297_D300del | <i>De novo</i> | Novel    |
| P76 | EDMD   | Exon7 | Ig-like domain | c.1366A>G                    | p.N456D        | <i>De novo</i> | Reported |
| P77 | EDMD   | Exon1 | Head           | c.92_94delAGA                | p.K32del       | <i>De novo</i> | Reported |
| P78 | L-CMD  | Exon4 | Coil 2A        | c.745C>T                     | p.R249W        | <i>De novo</i> | Reported |
| P79 | EDMD   | Exon7 | Ig-like domain | c.1357C>T                    | p.R453W        | <i>De novo</i> | Reported |
| P80 | EDMD   | Exon7 | Ig-like domain | c.1357C>T                    | p.R453W        | <i>De novo</i> | Reported |
| P81 | L-CMD  | Exon1 | Head           | c.94_96delAAG                | p.K32del       | <i>De novo</i> | Reported |

Abbreviations: L-CMD, *LMNA*-related congenital muscular dystrophy; EDMD, Emery-Dreifuss muscular dystrophy; LGMD1B, Limb-girdle muscular dystrophy type 1B; NLS, nuclear location signal; Ig, immunoglobulin.
